# Supplementary material
Source: PubMed Central journal article supplement (PMC3177648)
Supplement: supp_ddr331_ddr331supp_figs.pdf [file supp_ddr331_ddr331supp_figs.pdf]

**“Deep sequencing of small RNAs from human skin reveals major alterations in the psoriasis miRNAome”**

Cailin E. Joyce, Xiang Zhou, Jing Xia, Caitriona Ryan, Breck Thrash,  
Alan Menter, Weixiong Zhang, Anne M. Bowcock

**Supplementary figures and tables**

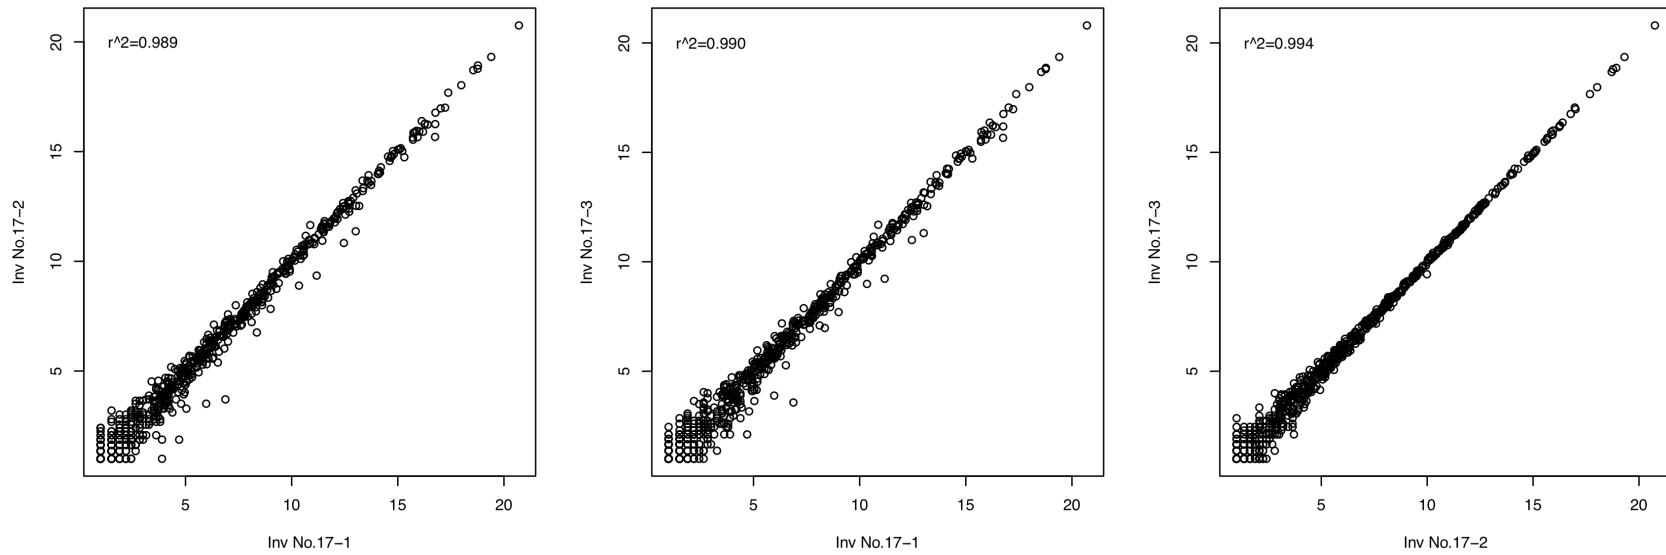

**Supplementary Figure 1. Pairwise comparisons of normalized digital read counts in three technical replicates.** RNA derived from a psoriatic skin biopsy “Inv #17” was prepared and sequenced independently three times. Each pairwise comparison is plotted separately. Numerical axes represent normalized digital read counts for indicated sample.

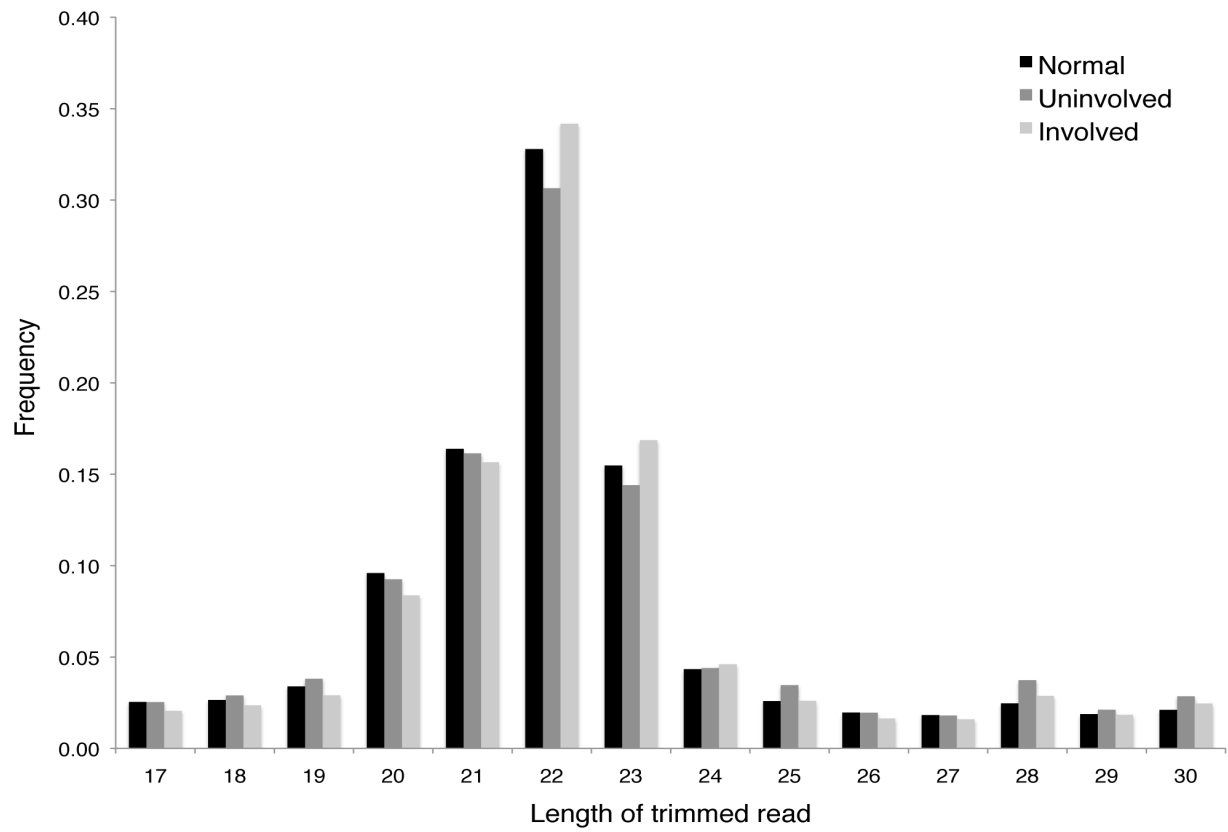

**Supplementary figure 2. Length distribution of trimmed small RNA reads in normal, uninvolved psoriatic, and involved psoriatic skin.**

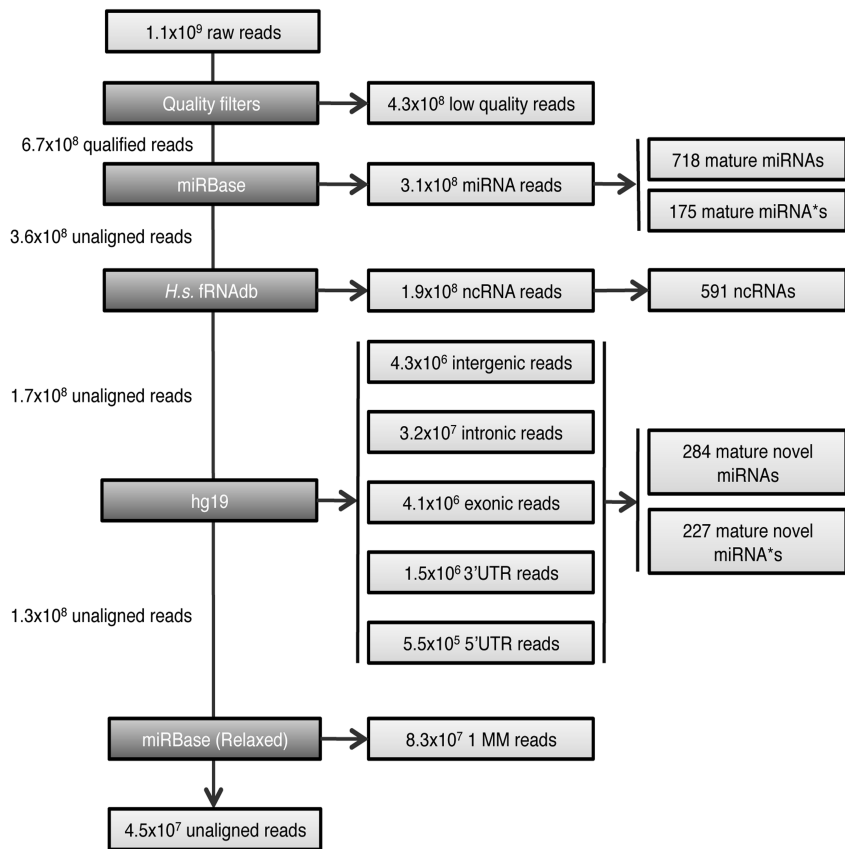

**Supplementary figure 3. Flowchart describing alignment of small RNA reads to human sequence databases.** All reads aligned with zero mismatches, unless relaxed parameters are indicated (ie. 1MM=one mismatch). MiRNA\* refers to mature miRNAs generated from the minor strand of the double stranded miRNA precursor. ncRNA refers to non-coding RNAs, such as tRNAs, piwi-interacting RNAs, snoRNAs, etc. in the *H. sapien* functional RNA database (see Materials and Methods).

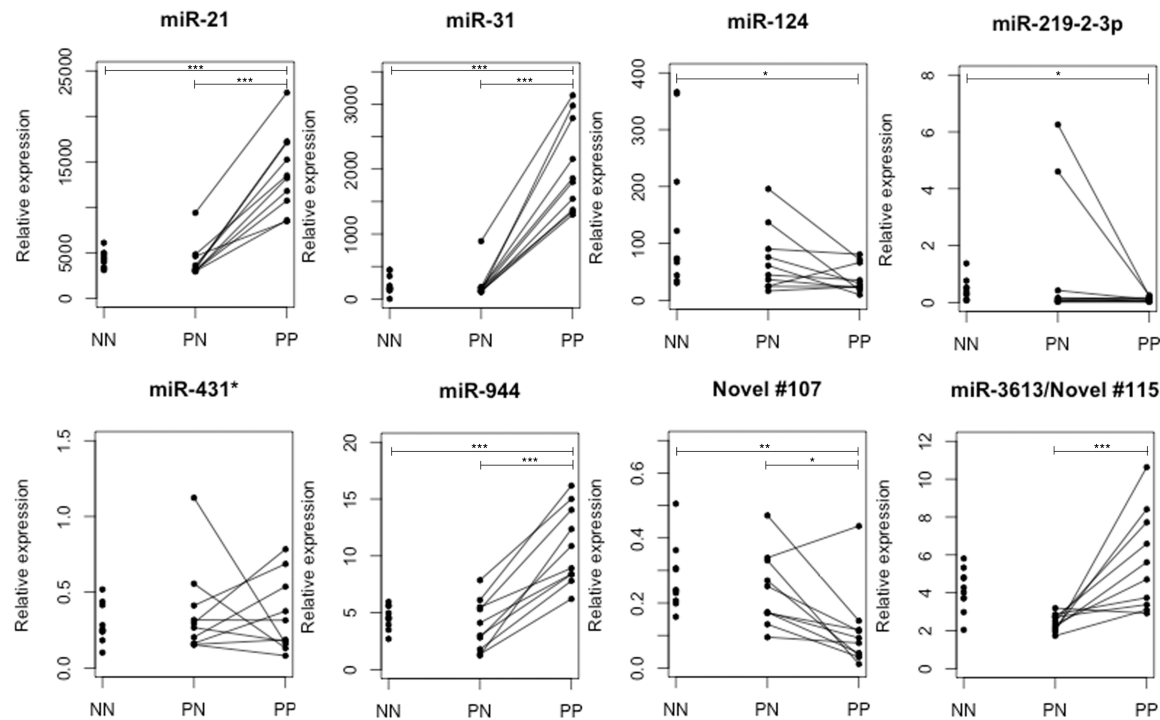

**Supplementary figure 4. Validation of differentially expressed known and novel miRNAs.** qRT-PCR levels of differentially expressed miRNAs in ten NN, ten PN, and ten PP patients. Lines indicate matched uninvolved and involved samples from the same patient (\*\*\*) $p < 0.001$ , (\*\*) $p < 0.01$ , (\*) $p < 0.05$ ). Relative expression was calculated with respect to the endogenous snoRNA Z30 (see Materials and Methods). Normal skin, NN; Uninvolved psoriatic skin, PN; Involved psoriatic skin, PP.
